# Supplementary material
Source: PubMed Central journal article supplement (PMC4607621)
Supplement: 15_073_Cohen_Suppl.pdf [file 15_073_Cohen_Suppl.pdf]

## Supplemental Data

# Humanin Derivatives Inhibit Necrotic Cell Death in Neurons

Aviv Cohen,<sup>1</sup> Jenny Lerner-Yardeni,<sup>1</sup> David Meridor,<sup>1</sup> Roni Kasher,<sup>2</sup> Ilana Nathan,<sup>3,4</sup> and Abraham H Parola<sup>1\*</sup>

Online address: <http://www.molmed.org>

The Feinstein Institute  
for Medical Research 

Empowering Imagination. Pioneering Discovery.®

### SUPPORTING INFORMATION

The peptides were characterized by analytical RP-HPLC and MALDI-TOF/MS, and the results are shown in Supplementary Table S1.

**Supplementary Table S1.** Amino acids sequences, MALDI-TOF/MS data, and analytical RP-HPLC data for the peptides examined in this study.

| Peptide Name   | Sequence <sup>a</sup>                     | MS, (M+H) <sup>+</sup> |                           | Analytical HPLC RT, (min) <sup>c</sup> |
|----------------|-------------------------------------------|------------------------|---------------------------|----------------------------------------|
|                |                                           | Calculated             | Experimental <sup>b</sup> |                                        |
| HN             | MAPRGFSCLLLLTSEIDLPKRRA                   | 2686                   | 2686.2                    | 28.3                                   |
| HNG            | MAPRGFSCLLLLT <b>G</b> EIDLPKRRA          | 2656                   | 2656.5                    | 29.0                                   |
| AGA-HNG        | MAP <b>AG</b> ASCLLLLT <b>G</b> EIDLPKRRA | 2495                   | 2495.2                    | 28.7                                   |
| AGA(C8R)-HNG17 | P <b>AG</b> ASRLLLLT <b>G</b> EIDLK       | 1736                   | 1736.7                    | 27.8                                   |

<sup>a</sup>Bold letters indicate the amino acid residues that were replaced in the HN derivatives.

<sup>b</sup>Determined by MALDI-TOF/MS.

<sup>c</sup>Determined by analytical RP-HPLC, using the analytical method described. Peptides were purified by preparative RP-HPLC. Purified peptide had > 95% purity, by RP-HPLC.
